# Supplementary material for: Risk classification at diagnosis predicts post-HCT outcomes in intermediate-, adverse-risk, and KMT2A-rearranged AML
Source: PubMed Central journal article supplement — Blood Adv. 2022 Feb 1;6(3):828–47. doi: 10.1182/bloodadvances.2021004881 (PMC8945306; doi:10.1182/bloodadvances.2021004881), 2022-02-01
Supplement: advancesADV2021004881-suppl1.pdf [file advancesADV2021004881-suppl1.pdf]

## **SUPPLEMENTAL INFORMATION**

### **Choice of AML-MRC Classification system**

The AML classification system used for analysis was the AML-MRC 2010 system. While previous CIBMTR studies have used the 2007 ECOG / SWOG classification system, this system does not classify patients based on 11q23 abnormalities. The 2017 European Leukemia Network (ELN) system was considered, however this system includes molecular abnormalities for classification. Reliable genomic data was not available for all patients in our retrospective cohort, reflecting the advent of the use of molecular data during the time period under study as well as different practice patterns at sites across the world who contribute to the database. As such, the 2010 AML-MRC system was used, which categorizes both t(9;11) and t(11;19) as intermediate risk, with all other 11q23 rearrangements considered adverse risk, and does not use molecular data. Of note, this system also considers complex karyotype as  $\geq 4$  abnormalities and does not include the designation of monosomal karyotype.

**Supplemental Table 1. Patient selection**

| Selection Criteria (CRF Sep 2017)                    | Excluded:                                                                                                                                        | Remaining: |
|------------------------------------------------------|--------------------------------------------------------------------------------------------------------------------------------------------------|------------|
| <b>Inclusion:</b>                                    |                                                                                                                                                  |            |
| First Allo Tx for AML from 2007-2016 in adults 18-70 | APML (n=79)                                                                                                                                      | 8630       |
| Disease status prior to HCT: CR1                     | CR2 (n=1656)<br>CR3+(n=122)<br>PIF (n=1108)<br>Relapse (n=848)<br>Missing (n=24)                                                                 | 4872       |
| Cytogenetics:<br>Poor/KMT2A/Intermediate             | Favorable cytogenetics (n=120)<br>Unknown cytogenetics (n=369)                                                                                   | 4383       |
| <b>Exclusion</b>                                     |                                                                                                                                                  |            |
| Syngeneic Twins                                      | (n=22)                                                                                                                                           | 4361       |
| Consent                                              | (n=97)                                                                                                                                           | 4264       |
| Embargoed Centers                                    | (n=88)                                                                                                                                           | 4176       |
| Forms selection                                      | Missing disease specific forms (n=29)<br>Missing 100 day forms (n=13)<br>Missing Baseline forms (n=3)<br>Missing 2200/2300 follow up form (n=23) | 4108       |
| <b>Additional exclusions</b>                         |                                                                                                                                                  |            |
| Donor types                                          | Mis-matched unrelated ( $\leq 6/8$ ) (n=17)<br>Multi-donor (n=39)<br>Unrelated (matching unknown) (n=53)                                         | 3999       |
| Cytogenetics after review (ECOG-ACRIN)               | Favorable cytogenetics (n=86)<br>Not classifiable (n=9)                                                                                          | 3904       |
| Ex-vivo TCD/ CD34 selection                          | N=125                                                                                                                                            | 3779       |

## Supplemental Table 2.

### Completeness of Follow-up

| (set date:<br>06/01/17) | KMT2A (N =<br>434), % | Intermediate (N = 2466), % | Poor (N = 1004), % |
|-------------------------|-----------------------|----------------------------|--------------------|
| 1-year                  | 97                    | 96                         | 98                 |
| 2-year                  | 93                    | 92                         | 94                 |
| 3-year                  | 90                    | 90                         | 91                 |

## Supplemental Table 3. Multivariate analysis for comparison between translocation partner

| Covariates                               | HR (95% CI)      | p-value<br>stepdown<br>Bonferroni |
|------------------------------------------|------------------|-----------------------------------|
| <b><u>NRM</u></b>                        |                  |                                   |
| t(9;11) vs. remaining KMT2A              | 0.96 (0.58-1.60) | 1.00                              |
| t(11;19) vs. remaining KMT2A             | 0.74 (0.38-1.46) | 1.00                              |
| t(9;11) and t(11;19) vs. remaining KMT2A | 0.80 (0.48-1.32) | 1.00                              |
| <b><u>Relapse</u></b>                    |                  |                                   |
|                                          | Reference        |                                   |
| t(9;11) vs. remaining KMT2A              | 0.76 (0.49-1.18) | 0.69                              |
| t(11;19) vs. remaining KMT2A             | 1.10 (0.68-1.77) | 0.85                              |
| t(9;11) and t(11;19) vs. remaining KMT2A | 0.84 (0.55-1.26) | 0.85                              |
| <b><u>LFS</u></b>                        |                  |                                   |
|                                          | Reference        |                                   |
| t(9;11) vs. remaining KMT2A              | 0.78 (0.56-1.08) | 0.34                              |
| t(11;19) vs. remaining KMT2A             | 1.00 (0.68-1.47) | 0.94                              |
| t(9;11) and t(11;19) vs. remaining KMT2A | 0.78 (0.57-1.07) | 0.34                              |
| <b><u>OS</u></b>                         |                  |                                   |
|                                          | Reference        |                                   |
| t(9;11) vs. remaining KMT2A              | 0.84 (0.60-1.19) | 0.42                              |
| t(11;19) vs. remaining KMT2A             | 0.76 (0.49-1.17) | 0.42                              |
| t(9;11) and t(11;19) vs. remaining KMT2A | 0.71 (0.51-0.99) | 0.13                              |

**Supplemental Table 4. Repeat main analyses for *KMT2A* with / without additional abnormalities**

| Covariates            | Original model   |         | KMT2A without additional abnorm. |         | KMT2A with additional abnorm. |         |
|-----------------------|------------------|---------|----------------------------------|---------|-------------------------------|---------|
|                       | HR (95% CI)      | p-value | HR (95% CI)                      | p-value | HR (95% CI)                   | p-value |
| <b><u>NRM</u></b>     |                  |         |                                  |         |                               |         |
| Main effect           |                  | 0.11    |                                  | 0.08    |                               | 0.15    |
| Intermediate          | Reference        |         | Reference                        |         | Reference                     |         |
| KMT2A                 | 1.15 (0.92-1.44) | 0.21    | 1.22 (0.94-1.58)                 | 0.14    | 1.05 (0.73-1.52)              | 0.78    |
| Adverse               | 1.17 (1.00-1.38) | 0.05    | 1.18 (1.00-1.38)                 | 0.05    | 1.17 (1.00-1.38)              | 0.05    |
| <b><u>Relapse</u></b> |                  |         |                                  |         |                               |         |
| Main effect           |                  | < 0.001 |                                  | < 0.001 |                               | < 0.001 |
| Intermediate          | Reference        |         | Reference                        |         | Reference                     |         |
| KMT2A                 | 1.21 (1.01-1.46) | 0.04    | 1.30 (1.05-1.61)                 | 0.02    | 1.04 (0.76-1.42)              | 0.81    |
| Adverse               | 1.68 (1.49-1.91) | < 0.001 | 1.68 (1.48-1.90)                 | < 0.001 | 1.67 (1.47-1.89)              | < 0.001 |
| <b><u>LFS</u></b>     |                  |         |                                  |         |                               |         |
| Main effect           |                  | < 0.001 |                                  | < 0.001 |                               | < 0.001 |
| Intermediate          | Reference        |         | Reference                        |         | Reference                     |         |
| KMT2A                 | 1.22 (1.06-1.41) | 0.007   | 1.30 (1.10-1.54)                 | 0.002   | 1.08 (0.85-1.37)              | 0.54    |
| Adverse               | 1.46 (1.32-1.61) | < 0.001 | 1.46 (1.32-1.61)                 | < 0.001 | 1.45 (1.32-1.61)              | < 0.001 |
| <b><u>OS</u></b>      |                  |         |                                  |         |                               |         |
| Main effect           |                  | < 0.001 |                                  | < 0.001 |                               | < 0.001 |
| Intermediate          | Reference        |         | Reference                        |         | Reference                     |         |
| KMT2A                 | 1.32 (1.13-1.53) | < 0.001 | 1.39 (1.17-1.66)                 | < 0.001 | 1.18 (0.92-1.52)              | 0.19    |
| Adverse               | 1.45 (1.31-1.61) | < 0.001 | 1.45 (1.30-1.61)                 | < 0.001 | 1.45 (1.30-1.61)              | < 0.001 |

Note: same adjusting factors were selected for the additional 2 analyses but only the main effect is presented in the table.

**Supplemental Table 5. Univariate Analysis of Outcomes in *KMT2A* with Complex Karyotype (4 or more abnormalities) vs. Not**

| Outcomes                    | Complex karyotype |               |              |               | P Value |
|-----------------------------|-------------------|---------------|--------------|---------------|---------|
|                             | No (N = 397)      |               | Yes (N = 29) |               |         |
|                             | N                 | Prob (95% CI) | N            | Prob (95% CI) |         |
| Relapse                     | 397               |               | 29           |               | 0.223   |
| 1-year                      | 210               | 25 (21-29)%   | 17           | 24 (10-41)%   | 0.933   |
| Treatment related mortality | 397               |               | 29           |               | 0.765   |
| 1-year                      | 210               | 16 (13-20)%   | 17           | 17 (6-33)%    | 0.866   |
| Disease free survival       | 397               |               | 29           |               | 0.341   |
| 1-year                      | 209               | 59 (54-64)%   | 16           | 59 (41-76)%   | 0.954   |
| Overall survival            | 397               |               | 29           |               | 0.183   |
| 1-year                      | 242               | 68 (64-73)%   | 17           | 62 (44-78)%   | 0.489   |

**Operational definition of MRD at time of HCT for AML/ALL**

Positive: if answered “no” to molecular or cytogenetic or flow remission prior to HCT, or disease detected in BM or blood by flow prior to HCT, or “positive” to following molecular test prior to HCT: CEBPA, FLT3 D835, FLT3 ITD, IDH1, IDH2, KIT, NPM1, BCR/ABL, TEL-AML, other

Negative: if not classified as MRD positive, and answered “yes” to molecular or cytogenetic or flow remission prior to HCT, or disease not detected in BM or blood by flow prior to HCT

Missing: if not identified as either positive or negative
